# Supplementary material
Source: Elsevier journal article supplement (https://comptes-rendus.academie-sciences.fr/biologies/article/10.1016/j.crvi.2014.09.006/file/attach/mmc1.pdf)
Supplement: mmc1 [file mmc1.pdf]

Appendix 1. Fauna collected in the six studied temporary wetlands. EZZ, Ezzoubia; GGT, Garâa Guetma; GS1, Garâa Sejenane1; GS2, Garâa Sejenane2; GUE, Guetma; MCH, Majen Choucha.

| Taxon                                         | GUE | GS1 | EZZ | GS2 | GGT | MCH |
|-----------------------------------------------|-----|-----|-----|-----|-----|-----|
| <b>Oligochaeta</b>                            |     |     |     |     |     |     |
| Oligochaeta undet.                            | x   |     | x   |     | x   |     |
| <b>Hirudinea</b>                              |     |     |     |     |     |     |
| Erpobdellidae                                 |     |     |     |     | x   |     |
| Hirudinidae                                   |     |     |     |     |     | x   |
| <b>Gastropoda</b>                             |     |     |     |     |     |     |
| Hydrobiidae                                   |     |     |     |     | x   |     |
| Lymnaeidae                                    | x   | x   | x   | x   | x   | x   |
| Physidae                                      |     |     | x   |     | x   | x   |
| Planorbidae                                   | x   | x   | x   | x   | x   | x   |
| <b>Arachnida</b>                              |     |     |     |     |     |     |
| Eylaidae                                      |     |     |     |     |     |     |
| <i>Eylais</i> sp.                             |     | x   | x   | x   | x   | x   |
| Hydrachnidae                                  |     |     |     |     |     |     |
| <i>Hydrachna</i> sp.                          |     | x   |     | x   |     |     |
| <b>Isopoda</b>                                |     |     |     |     |     |     |
| Asellidae                                     |     |     | x   | x   |     |     |
| <b>Anostraca</b>                              |     |     | x   | x   | x   |     |
| Chirocephalidae                               |     |     |     |     |     |     |
| <i>Chirocephalus</i> sp.                      |     |     |     |     | x   |     |
| <b>Notostraca</b>                             |     | x   | x   | x   |     |     |
| Triopsidae                                    |     |     |     |     |     |     |
| <i>Lepidurus apus lubbocki</i> (Brauer, 1873) |     | x   |     | x   |     |     |
| <b>Ephemeroptera</b>                          |     |     |     |     |     |     |
| Baetidae                                      |     |     |     |     |     |     |
| <i>Cloeon</i> sp.                             |     | x   | x   | x   |     | x   |
| <b>Odonata</b>                                |     |     |     |     |     |     |
| Lestidae                                      |     |     |     |     |     |     |
| <i>Lestes</i> sp.                             | x   | x   | x   | x   | x   | x   |
| Aeshnidae                                     |     |     | x   | x   | x   | x   |
| Coenagrionidae                                |     |     |     |     |     | x   |
| Libellulidae                                  |     | x   | x   | x   | x   | x   |
| <b>Hemiptera</b>                              |     |     |     |     |     |     |
| Belostomatidae                                |     |     |     |     |     |     |
| <i>Appasus</i> sp.                            |     |     |     |     |     | x   |
| Corixidae                                     |     |     |     |     |     |     |
| <i>Corixa</i> sp.                             |     | x   | x   | x   | x   | x   |
| Corixidae undet.                              | x   | x   | x   | x   | x   | x   |
| Naucoridae                                    |     |     |     |     |     |     |
| <i>Naucoris maculates</i> (Fabricius, 1798)   | x   |     | x   |     |     | x   |
| Notonectidae                                  |     |     |     |     |     |     |
| <i>Notonecta</i> sp.                          |     | x   | x   | x   | x   | x   |
| Pleidae                                       |     |     |     |     |     |     |
| <i>Plea minutissima</i>                       |     |     |     |     |     | x   |
| Gerridae                                      | x   |     |     |     |     |     |
| Veliidae                                      |     |     |     |     | x   |     |
| <b>Coleoptera</b>                             |     |     |     |     |     |     |
| Gyrinidae undet.                              | x   | x   | x   | x   | x   |     |
| Haliplidae                                    |     |     |     |     |     |     |
| <i>Halipus</i> sp.                            | x   | x   | x   |     | x   | x   |

| <b>Taxon</b>                                   | <b>GUE</b> | <b>GS1</b> | <b>EZZ</b> | <b>GS2</b> | <b>GGT</b> | <b>MCH</b> |
|------------------------------------------------|------------|------------|------------|------------|------------|------------|
| Hygrobiidae                                    |            |            |            |            |            |            |
| <i>Hygrobia</i> sp.                            |            |            |            |            | X          |            |
| Noteridae                                      |            |            |            |            |            |            |
| <i>Noterus</i> sp.                             | X          |            | X          | X          | X          | X          |
| Dytiscidae                                     |            |            |            |            |            |            |
| <i>Agabus</i> sp.                              |            |            | X          | X          | X          | X          |
| <i>Bidessus</i> sp.                            |            |            | X          | X          |            | X          |
| <i>Colymbetes</i> sp.                          |            |            |            |            | X          |            |
| <i>Cybister</i> sp.                            | X          | X          | X          | X          |            | X          |
| <i>Dytiscus</i> sp.                            | X          | X          | X          | X          | X          | X          |
| <i>Hydrovates</i> sp.                          |            |            |            |            | X          |            |
| <i>Ilybius</i> sp.                             | X          |            |            |            |            |            |
| <i>Rhantus</i> sp.                             |            |            |            |            |            | X          |
| <i>Yola</i> sp.                                |            |            | X          |            |            |            |
| Hydrophilidae                                  |            |            |            |            |            |            |
| <i>Berosus</i> sp.                             |            | X          | X          | X          | X          | X          |
| <i>Enochrus</i> sp.                            |            | X          | X          | X          | X          | X          |
| <i>Hydrobius</i> sp.                           |            |            |            | X          | X          |            |
| <i>Laccobius</i> sp.                           |            |            |            | X          |            |            |
| <i>Limnoxenus</i> sp.                          | X          |            |            |            |            | X          |
| Helophoridae                                   |            |            |            |            |            |            |
| <i>Helophorus</i> sp.                          |            | X          | X          | X          | X          |            |
| Hydrochidae                                    |            |            |            |            |            |            |
| <i>Hydrochus</i> sp.                           | X          |            |            |            | X          |            |
| Hydraenidae                                    |            |            |            |            |            |            |
| <i>Ochthebius</i> sp.                          | X          |            |            | X          | X          | X          |
| Dryopidae                                      |            |            |            |            |            |            |
| <i>Dryops</i> sp.                              | X          |            | X          |            | X          | X          |
| Elmidae undet.                                 | X          |            |            | X          |            |            |
| <b>Diptera</b>                                 |            |            |            |            |            |            |
| Culicidae                                      |            |            |            |            |            |            |
| <i>Anopheles labranchiae</i> (Falleroni, 1926) | X          |            | X          | X          |            | X          |
| <i>Anopheles</i> sp.                           | X          |            |            | X          | X          |            |
| <i>Culex theileri</i> (Theobald, 1903)         | X          | X          | X          | X          | X          | X          |
| Chaoboridae                                    |            |            |            |            |            |            |
| <i>Chaoborus</i> sp.                           | X          | X          | X          | X          | X          | X          |
| Chironomidae                                   | X          | X          | X          | X          | X          | X          |
| Ceratopogonidae                                |            |            |            |            |            |            |
| <i>Dasyhelea</i> sp.                           |            |            | X          |            | X          |            |
| Ceratopogonidae undet.                         | X          | X          | X          |            | X          | X          |
| Dixidae                                        |            |            |            |            |            |            |
| <i>Dixa</i> sp.                                | X          |            | X          | X          | X          | X          |
| <i>Dixella</i> sp.                             | X          | X          | X          | X          | X          | X          |
| Tipulidae                                      |            |            |            | X          | X          |            |
| Limoniidae                                     | X          |            | X          |            | X          |            |
| Ephydriidae                                    |            |            |            |            | X          | X          |
| Psychodidae                                    | X          | X          |            | X          | X          |            |
| Stratiomyidae                                  | X          |            | X          |            |            |            |
| Syrphidae                                      |            |            |            |            |            |            |
| <i>Eristalis tenax</i> (Linné, 1758)           | X          |            |            |            |            |            |
| <b>Trichoptera</b>                             |            |            |            |            |            |            |
| Limnephilidae                                  |            |            |            |            |            |            |
| <i>Limnephilus</i> sp.                         | X          | X          | X          | X          | X          | X          |

| <b>Taxon</b>                                      | <b>GUE</b> | <b>GS1</b> | <b>EZZ</b> | <b>GS2</b> | <b>GGT</b> | <b>MCH</b> |
|---------------------------------------------------|------------|------------|------------|------------|------------|------------|
| <b>Actinopterygii</b>                             |            |            |            |            |            |            |
| Cyprinidae                                        |            |            |            |            |            |            |
| <i>Pseudophoxinus callensis</i> (Guichenot, 1850) |            |            | x          |            |            |            |
| <b>Amphibia</b>                                   |            |            |            |            |            |            |
| Salamandridae                                     |            |            |            |            |            |            |
| <i>Pleurodeles nebulosus</i> (Guichenot, 1850)    | x          | x          | x          | x          |            | x          |
| Bufonidae                                         |            |            |            |            |            |            |
| <i>Bufoes boulengeri</i> (Lataste, 1879)          |            |            | x          |            |            |            |
| Discoglossidae                                    |            |            |            |            |            |            |
| <i>Discoglossus pictus</i> (Otth, 1837)           | x          | x          | x          | x          |            | x          |
